# Supplementary material for: Composite environmental indices—a case of rickety rankings
Source: PeerJ. 2023 Dec 11;11:e16325. doi: 10.7717/peerj.16325 (PMC10720475; doi:10.7717/peerj.16325)
Supplement: Supplemental Information 1 [file peerj-11-16325-s001.xlsx]

## Sheet: Data. EPI vs aENV 
	aENV (2010)		EPI (2010)
Country	original rank	normalised 0-100	original rank	normalised 0-100	Rank Difference	+/- removed
France	154	90	7	3.7037	-86.2963	86.2963		35.8546
Japan	167	97.6471	20	11.7284	-85.9187	85.9187
Colombia	152	88.8235	10	5.55556	-83.268	83.268		Kendall tau = -0.072, P<0.05
Niger	26	14.7059	158	96.9136	82.2077	82.2077
United Arab Emirates	28	15.8824	152	93.2099	77.3275	77.3275
Peru	162	94.7059	31	18.5185	-76.1874	76.1874
Chile	145	84.7059	16	9.25926	-75.4466	75.4466
Togo	40	22.9412	159	97.5309	74.5897	74.5897
United Kingdom	140	81.7647	14	8.02469	-73.74	73.74
Germany	143	83.5294	17	9.87654	-73.6529	73.6529
Mexico	166	97.0588	43	25.9259	-71.1329	71.1329
Ecuador	151	88.2353	30	17.9012	-70.3341	70.3341
Guinea-Bissau	20	11.1765	132	80.8642	69.6877	69.6877
Italy	134	78.2353	18	10.4938	-67.7415	67.7415
Burundi	35	20	140	85.8025	65.8025	65.8025
Canada	160	93.5294	46	27.7778	-65.7516	65.7516
Australia	163	95.2941	51	30.8642	-64.4299	64.4299
New Zealand	125	72.9412	15	8.64198	-64.2992	64.2992
Spain	135	78.8235	25	14.8148	-64.0087	64.0087
Mauritania	61	35.2941	161	98.7654	63.4713	63.4713
Benin	55	31.7647	154	94.4444	62.6797	62.6797
United States of America	170	99.4118	61	37.037	-62.3747	62.3747
Brazil	171	100	62	37.6543	-62.3457	62.3457
Costa Rica	109	63.5294	3	1.23457	-62.2948	62.2948
Philippines	155	90.5882	50	30.2469	-60.3413	60.3413
Malaysia	159	92.9412	54	32.716	-60.2251	60.2251
Czechia (Czech Republic)	124	72.3529	22	12.963	-59.39	59.39
Norway	106	61.7647	5	2.46914	-59.2956	59.2956
Hungary	131	76.4706	33	19.7531	-56.7175	56.7175
Portugal	113	65.8824	19	11.1111	-54.7712	54.7712
Russia	164	95.8824	69	41.9753	-53.907	53.907
Romania	138	80.5882	45	27.1605	-53.4277	53.4277
Iceland	91	52.9412	1	0	-52.9412	52.9412
Argentina	161	94.1176	70	42.5926	-51.5251	51.5251
Thailand	156	91.1765	67	40.7407	-50.4357	50.4357
Mongolia	65	37.6471	142	87.037	49.39	49.39
Venezuela	150	87.6471	64	38.8889	-48.7582	48.7582
Senegal	73	42.3529	143	87.6543	45.3014	45.3014
Haiti	89	51.7647	155	95.0617	43.297	43.297
Nepal	111	64.7059	38	22.8395	-41.8664	41.8664
Botswana	86	50	149	91.358	41.358	41.358
Denmark	103	60	32	19.1358	-40.8642	40.8642
Panama	94	54.7059	24	14.1975	-40.5084	40.5084
Bosnia and Herzegovina	34	19.4118	98	59.8765	40.4648	40.4648
Austria	75	43.5294	8	4.32099	-39.2084	39.2084
Sri Lanka	127	74.1176	58	35.1852	-38.9325	38.9325
Ukraine	157	91.7647	87	53.0864	-38.6783	38.6783
Morocco	119	69.4118	52	31.4815	-37.9303	37.9303
Poland	128	74.7059	63	38.2716	-36.4343	36.4343
Angola	107	62.3529	160	98.1481	35.7952	35.7952
Burkina Faso	74	42.9412	128	78.3951	35.4539	35.4539
Turkey	141	82.3529	77	46.9136	-35.4394	35.4394
Netherlands	108	62.9412	47	28.3951	-34.5461	34.5461
Egypt	130	75.8824	68	41.358	-34.5243	34.5243
Slovakia	72	41.7647	13	7.40741	-34.3573	34.3573
Ireland	102	59.4118	44	26.5432	-32.8686	32.8686
Finland	68	39.4118	12	6.79012	-32.6216	32.6216
Algeria	99	57.6471	42	25.3086	-32.3384	32.3384
Jamaica	39	22.3529	89	54.321	31.968	31.968
Switzerland	56	32.3529	2	0.617284	-31.7357	31.7357
Oman	84	48.8235	131	80.2469	31.4234	31.4234
Paraguay	116	67.6471	60	36.4198	-31.2273	31.2273
Iran	133	77.6471	78	47.5309	-30.1162	30.1162
Republic of Korea (South Korea)	149	87.0588	94	57.4074	-29.6514	29.6514
Belarus	105	61.1765	53	32.0988	-29.0777	29.0777
Belgium	43	24.7059	88	53.7037	28.9978	28.9978
Cuba	57	32.9412	9	4.93827	-28.0029	28.0029
Myanmar (formerly Burma)	158	92.3529	110	67.284	-25.069	25.069
China	169	98.8235	121	74.0741	-24.7495	24.7495
Azerbaijan	47	27.0588	84	51.2346	24.1757	24.1757
Israel	110	64.1176	66	40.1235	-23.9942	23.9942
Mozambique	77	44.7059	112	68.5185	23.8126	23.8126
Vietnam	129	75.2941	85	51.8519	-23.4423	23.4423
Slovenia	19	10.5882	55	33.3333	22.7451	22.7451
Latvia	59	34.1176	21	12.3457	-21.772	21.772
Kyrgyzstan	46	26.4706	79	48.1481	21.6776	21.6776
India	165	96.4706	123	75.3086	-21.1619	21.1619
Jordan	67	38.8235	97	59.2593	20.4357	20.4357
Gabon	66	38.2353	95	58.0247	19.7894	19.7894
Estonia	93	54.1176	57	34.5679	-19.5497	19.5497
Tunisia	45	25.8824	74	45.0617	19.1794	19.1794
South Africa	153	89.4118	115	70.3704	-19.0414	19.0414
Moldova	58	33.5294	86	52.4691	18.9397	18.9397
Armenia	48	27.6471	76	46.2963	18.6492	18.6492
Ethiopia	117	68.2353	141	86.4198	18.1845	18.1845
Democratic Republic of the Congo	142	82.9412	106	64.8148	-18.1264	18.1264
Saudi Arabia	132	77.0588	99	60.4938	-16.565	16.565
Indonesia	168	98.2353	134	82.0988	-16.1365	16.1365
El Salvador	60	34.7059	34	20.3704	-14.3355	14.3355
Bulgaria	90	52.3529	65	39.5062	-12.8468	12.8468
Zimbabwe	115	67.0588	127	77.7778	10.719	10.719
Dominican Republic	54	31.1765	36	21.6049	-9.57153	9.57153
Pakistan	147	85.8824	125	76.5432	-9.33914	9.33914
Tanzania	148	86.4706	126	77.1605	-9.31009	9.31009
Nicaragua	82	47.6471	93	56.7901	9.14306	9.14306
Kazakhstan	81	47.0588	92	56.1728	9.11402	9.11402
Croatia	52	30	35	20.9877	-9.01235	9.01235
Kenya	98	57.0588	108	66.0494	8.99056	8.99056
Nigeria	146	85.2941	153	93.8272	8.53304	8.53304
Ghana	100	58.2353	109	66.6667	8.43137	8.43137
Sudan	122	71.1765	129	79.0123	7.83588	7.83588
Côte d'Ivoire	96	55.8824	102	62.3457	6.46333	6.46333
Albania	15	8.23529	23	13.5802	5.34495	5.34495
Bolivia	136	79.4118	137	83.9506	4.53885	4.53885
Trinidad and Tobago	101	58.8235	103	62.963	4.13943	4.13943
Bangladesh	139	81.1765	139	85.1852	4.00871	4.00871
Greece	80	46.4706	71	43.2099	-3.26071	3.26071
Lithuania	44	25.2941	37	22.2222	-3.0719	3.0719
Guatemala	114	66.4706	104	63.5802	-2.89034	2.89034
Madagascar	121	70.5882	120	73.4568	2.86855	2.86855
Honduras	120	70	118	72.2222	2.22222	2.22222
Cameroon	137	80	133	81.4815	1.48148	1.48148
Namibia	87	50.5882	81	49.3827	-1.20552	1.20552
Papua New Guinea	144	84.1176	138	84.5679	0.450254	0.450254

## Sheet: Data. EPI vs pENV
	pENV (2010)		EPI (2010)
Country	original rank	normalised 0-100	original rank	normalised 0-100	Rank Difference	+/- removed
Central African Republic	2	0.564972	162	99.3827	98.8177	98.8177		37.8062
Niger	5	2.25989	158	96.9136	94.6537	94.6537
Iceland	160	89.8305	1	0	-89.8305	89.8305		Kendall tau= -0.156, P<0.01
Bahrain	172	96.6102	14	8.02469	-88.5855	88.5855
Mali	14	7.34463	156	95.679	88.3344	88.3344
Turkmenistan	17	9.03955	157	96.2963	87.2567	87.2567
Japan	174	97.7401	20	11.7284	-86.0117	86.0117
Malta	163	91.5254	11	6.17284	-85.3526	85.3526
Singapore	178	100	28	16.6667	-83.3333	83.3333
Costa Rica	149	83.6158	3	1.23457	-82.3813	82.3813
New Zealand	161	90.3955	15	8.64198	-81.7535	81.7535
Botswana	28	15.2542	149	91.358	76.1038	76.1038
Angola	41	22.5989	160	98.1481	75.5493	75.5493
Germany	152	85.3107	17	9.87654	-75.4342	75.4342
Denmark	168	94.3503	32	19.1358	-75.2145	75.2145
France	136	76.2712	7	3.7037	-72.5675	72.5675
Ecuador	157	88.1356	30	17.9012	-70.2344	70.2344
Mauritania	52	28.8136	161	98.7654	69.9519	69.9519
Mauritius	130	72.8814	6	3.08642	-69.7949	69.7949
Uzbekistan	34	18.6441	144	88.2716	69.6275	69.6275
United Kingdom	137	76.8362	14	8.02469	-68.8115	68.8115
Peru	154	86.4407	31	18.5185	-67.9222	67.9222
Guinea-Bissau	24	12.9944	132	80.8642	67.8698	67.8698
Mongolia	35	19.209	142	87.037	67.828	67.828
Netherlands	169	94.9153	47	28.3951	-66.5202	66.5202
Bolivia	32	17.5141	137	83.9506	66.4365	66.4365
Spain	143	80.226	25	14.8148	-65.4112	65.4112
Philippines	170	95.4802	50	30.2469	-65.2333	65.2333
Cuba	122	68.3616	9	4.93827	-63.4233	63.4233
Malaysia	171	96.0452	54	32.716	-63.3291	63.3291
Italy	131	73.4463	18	10.4938	-62.9525	62.9525
Tajikstan	10	5.08475	111	67.9012	62.8165	62.8165
Ethiopia	45	24.8588	141	86.4198	61.561	61.561
Czechia (Czech Republic)	132	74.0113	22	12.963	-61.0483	61.0483
Swaziland	3	1.12994	101	61.7284	60.5985	60.5985
Sudan	36	19.774	129	79.0123	59.2383	59.2383
El Salvador	141	79.096	34	20.3704	-58.7257	58.7257
Sri Lanka	167	93.7853	58	35.1852	-58.6001	58.6001
Libya	26	14.1243	117	71.6049	57.4806	57.4806
Portugal	121	67.7966	19	11.1111	-56.6855	56.6855
Thailand	173	97.1751	67	40.7407	-56.4344	56.4344
Rwanda	48	26.5537	135	82.716	56.1624	56.1624
Lithuania	139	77.9661	37	22.2222	-55.7439	55.7439
Colombia	109	61.0169	10	5.55556	-55.4614	55.4614
Mexico	145	81.3559	43	25.9259	-55.43	55.43
Mozambique	25	13.5593	112	68.5185	54.9592	54.9592
Burkina Faso	44	24.2938	128	78.3951	54.1013	54.1013
Iraq	69	38.4181	150	91.9753	53.5572	53.5572
Israel	165	92.6554	66	40.1235	-52.5319	52.5319
Burundi	61	33.8983	140	85.8025	51.9042	51.9042
Guinea	57	31.6384	136	83.3333	51.6949	51.6949
Eritrea	20	10.7345	100	61.1111	50.3766	50.3766
Gabon	16	8.47458	95	58.0247	49.5501	49.5501
Poland	156	87.5706	63	38.2716	-49.299	49.299
Panama	113	63.2768	24	14.1975	-49.0793	49.0793
Zambia	56	31.0734	130	79.6296	48.5562	48.5562
Kazakhstan	15	7.9096	92	56.1728	48.2632	48.2632
Uganda	47	25.9887	119	72.8395	46.8508	46.8508
Morocco	138	77.4011	52	31.4815	-45.9196	45.9196
Hungary	116	64.9718	33	19.7531	-45.2187	45.2187
Dominican Republic	119	66.6667	36	21.6049	-45.0617	45.0617
Chile	97	54.2373	16	9.25926	-44.978	44.978
Equatorial Guinea	83	46.3277	146	89.5062	43.1785	43.1785
Democratic Republic of the Congo	40	22.0339	106	64.8148	42.7809	42.7809
Gambia	51	28.2486	116	70.9877	42.7391	42.7391
Congo	39	21.4689	105	64.1975	42.7286	42.7286
Saudi Arabia	33	18.0791	99	60.4938	42.4147	42.4147
Kenya	43	23.7288	108	66.0494	42.3206	42.3206
Republic of Korea (South Korea)	177	99.435	94	57.4074	-42.0276	42.0276
United Arab Emirates	92	51.4124	152	93.2099	41.7974	41.7974
Djibouti	9	4.51977	75	45.679	41.1592	41.1592
Togo	103	57.6271	159	97.5309	39.9037	39.9037
Benin	98	54.8023	154	94.4444	39.6422	39.6422
Yemen	66	36.7232	124	75.9259	39.2028	39.2028
Switzerland	71	39.548	2	0.617284	-38.9307	38.9307
Nepal	106	59.322	38	22.8395	-36.4825	36.4825
Malawi	53	29.3785	107	65.4321	36.0536	36.0536
Guyana	27	14.6893	82	50	35.3107	35.3107
Latvia	85	47.4576	21	12.3457	-35.1119	35.1119
Oman	84	46.8927	131	80.2469	33.3543	33.3543
United States of America	124	69.4915	61	37.037	-32.4545	32.4545
Tanzania	81	45.1977	126	77.1605	31.9628	31.9628
Cameroon	89	49.7175	133	81.4815	31.764	31.764
Kyrgyzstan	31	16.9492	79	48.1481	31.199	31.199
Vietnam	148	83.0508	85	51.8519	-31.199	31.199
Azerbaijan	37	20.339	84	51.2346	30.8956	30.8956
Ireland	101	56.4972	44	26.5432	-29.954	29.954
Sierra Leone	125	70.0565	163	100	29.9435	29.9435
Kuwait	175	98.3051	113	69.1358	-29.1693	29.1693
Slovakia	65	36.1582	13	7.40741	-28.7508	28.7508
Austria	58	32.2034	8	4.32099	-27.8824	27.8824
Nigeria	118	66.1017	153	93.8272	27.7255	27.7255
Jamaica	146	81.9209	89	54.321	-27.5999	27.5999
Zimbabwe	93	51.9774	127	77.7778	25.8004	25.8004
Slovenia	104	58.1921	55	33.3333	-24.8588	24.8588
Papua New Guinea	107	59.887	138	84.5679	24.6809	24.6809
Brazil	111	62.1469	62	37.6543	-24.4926	24.4926
Quatar	176	98.8701	122	74.6914	-24.1787	24.1787
Venezuela	112	62.7119	64	38.8889	-23.823	23.823
Haiti	128	71.7514	155	95.0617	23.3103	23.3103
Norway	46	25.4237	5	2.46914	-22.9546	22.9546
Bulgaria	110	61.5819	65	39.5062	-22.0757	22.0757
Bosnia and Herzegovina	68	37.8531	98	59.8765	22.0234	22.0234
Croatia	77	42.9379	35	20.9877	-21.9502	21.9502
Belize	67	37.2881	26	15.4321	-21.856	21.856
Ukraine	133	74.5763	87	53.0864	-21.4899	21.4899
Guatemala	151	84.7458	104	63.5802	-21.1655	21.1655
Senegal	120	67.2316	143	87.6543	20.4227	20.4227
Lebanon	134	75.1412	90	54.9383	-20.203	20.203
Armenia	117	65.5367	76	46.2963	-19.2404	19.2404
Algeria	79	44.0678	42	25.3086	-18.7592	18.7592
Romania	82	45.7627	45	27.1605	-18.6022	18.6022
Bhutan	11	5.64972	40	24.0741	18.4244	18.4244
Côte d'Ivoire	80	44.6328	102	62.3457	17.7129	17.7129
Solomonn Islands	155	87.0056	114	69.7531	-17.2526	17.2526
Honduras	159	89.2655	118	72.2222	-17.0433	17.0433
China	162	90.9605	121	74.0741	-16.8864	16.8864
Canada	21	11.2994	46	27.7778	16.4783	16.4783
Belgium	123	68.9266	88	53.7037	-15.2228	15.2228
Sweeden	30	16.3842	4	1.85185	-14.5323	14.5323
Antigua and Barbuda	4	1.69492	27	16.0494	14.3545	14.3545
Egypt	99	55.3672	68	41.358	-14.0092	14.0092
Myanmar (formerly Burma)	144	80.791	110	67.284	-13.507	13.507
Suriname	19	10.1695	39	23.4568	13.2873	13.2873
Ghana	142	79.661	109	66.6667	-12.9944	12.9944
Georgia	42	23.1638	59	35.8025	12.6386	12.6386
Iran	63	35.0282	78	47.5309	12.5026	12.5026
Sao Tome and Principe	78	43.5028	91	55.5556	12.0527	12.0527
Turkey	105	58.7571	77	46.9136	-11.8435	11.8435
Indonesia	166	93.2203	134	82.0988	-11.1216	11.1216
Moldova	75	41.8079	86	52.4691	10.6612	10.6612
Fiji	70	38.9831	49	29.6296	-9.35342	9.35342
Paraguay	49	27.1186	60	36.4198	9.30111	9.30111
Trinidad and Tobago	96	53.6723	103	62.963	9.29065	9.29065
Russia	59	32.7684	69	41.9753	9.20695	9.20695
Belarus	74	41.2429	53	32.0988	-9.14417	9.14417
Finland	29	15.8192	12	6.79012	-9.02909	9.02909
Namibia	73	40.678	81	49.3827	8.70475	8.70475
Laos	102	57.0621	80	48.7654	-8.29671	8.29671
Argentina	91	50.8475	70	42.5926	-8.25487	8.25487
Uruguay	76	42.3729	83	50.6173	8.2444	8.2444
South Africa	140	78.5311	115	70.3704	-8.1607	8.1607
Nicaragua	115	64.4068	93	56.7901	-7.61666	7.61666
Albania	38	20.904	23	13.5802	-7.32371	7.32371
India	147	82.4859	123	75.3086	-7.17723	7.17723
Bangladesh	164	92.0904	139	85.1852	-6.90521	6.90521
Pakistan	126	70.6215	125	76.5432	5.92174	5.92174
Luxembourg	55	30.5085	41	24.6914	-5.81712	5.81712
Greece	87	48.5876	71	43.2099	-5.37769	5.37769
Cambodia	153	85.8757	148	90.7407	4.86503	4.86503
Jordan	114	63.8418	97	59.2593	-4.58255	4.58255
Macedonia	72	40.113	73	44.4444	4.33145	4.33145
Tunisia	88	49.1525	74	45.0617	-4.09081	4.09081
Australia	60	33.3333	51	30.8642	-2.46914	2.46914
Madagascar	127	71.1864	120	73.4568	2.27035	2.27035
Syria	64	35.5932	56	33.9506	-1.6426	1.6426
North Korea	158	88.7006	147	90.1235	1.42289	1.42289
Estonia	62	34.4633	57	34.5679	0.104624	0.104624

## Sheet: Data. EPI vs EF pc
	EF pc (2018)		EPI (2018)
Country	rank best to worst	normalised 0-100	rank best to worst	normalised	rank difference	+/- removed
Burundi	15	7.6087	180	100	92.3913	92.3913		average difference
Haiti	9	4.34783	174	96.648	92.3002	92.3002		45.6222
Bangladesh	18	9.23913	179	99.4413	90.2022	90.2022
Denmark	167	90.2174	3	1.11732	-89.1001	89.1001		Kendall tau = -0.483, P<0.01
Pakistan	12	5.97826	169	93.8547	87.8765	87.8765
Madagascar	19	9.78261	175	97.2067	87.4241	87.4241
Angola	16	8.15217	170	94.4134	86.2612	86.2612
Finland	166	89.6739	10	5.02793	-84.646	84.646
Austria	162	87.5	8	3.91061	-83.5894	83.5894
Belgium	168	90.7609	15	7.82123	-82.9396	82.9396
Nepal	31	16.3043	176	97.7654	81.461	81.461
Canada	175	94.5652	25	13.4078	-81.1574	81.1574
United States of America	177	95.6522	27	14.5251	-81.127	81.127
India	34	17.9348	177	98.324	80.3892	80.3892
Australia	169	91.3043	21	11.1732	-80.1312	80.1312
Norway	157	84.7826	14	7.26257	-77.52	77.52
Ireland	151	81.5217	9	4.46927	-77.0525	77.0525
Netherlands	158	85.3261	18	9.49721	-75.8289	75.8289
France	139	75	2	0.558659	-74.4413	74.4413
Trinidad and Tobago	171	92.3913	35	18.9944	-73.3969	73.3969
Switzerland	136	73.3696	1	0	-73.3696	73.3696
New Zealand	152	82.0652	17	8.93855	-73.1267	73.1267
Lithuania	161	86.9565	29	15.6425	-71.3141	71.3141
Germany	144	77.7174	13	6.70391	-71.0135	71.0135
Cameroon	35	18.4783	161	89.3855	70.9072	70.9072
Latvia	165	89.1304	37	20.1117	-69.0187	69.0187
Mozambique	13	6.52174	135	74.8603	68.3386	68.3386
Czech Republic	159	85.8696	33	17.8771	-67.9925	67.9925
Niger	52	27.7174	172	95.5307	67.8133	67.8133
Spain	137	73.913	12	6.14525	-67.7678	67.7678
Estonia	174	94.0217	48	26.257	-67.7648	67.7648
United Kingdom	130	70.1087	6	2.7933	-67.3154	67.3154
Israel	143	77.1739	19	10.0559	-67.118	67.118
Ethiopia	22	11.413	141	78.2123	66.7992	66.7992
Hungary	125	67.3913	4	1.67598	-65.7153	65.7153
Japan	141	76.087	20	10.6145	-65.4724	65.4724
Burkina Faso	39	20.6522	154	85.4749	64.8227	64.8227
Slovenia	154	83.1522	34	18.4358	-64.7164	64.7164
Italy	135	72.8261	16	8.37989	-64.4462	64.4462
Tanzania	5	2.17391	119	65.9218	63.7479	63.7479
Slovakia	145	78.2609	28	15.0838	-63.1771	63.1771
Benin	55	29.3478	166	92.1788	62.8309	62.8309
Kenya	20	10.3261	130	72.067	61.741	61.741
Portugal	140	75.5435	26	13.9665	-61.577	61.577
Greece	129	69.5652	22	11.7318	-57.8334	57.8334
Papua New Guinea	63	33.6957	164	91.0615	57.3658	57.3658
CÃ´te d'Ivoire	43	22.8261	139	77.095	54.2689	54.2689
Russian Federation	153	82.6087	52	28.4916	-54.1171	54.1171
United Arab Emirates	176	95.1087	77	42.4581	-52.6506	52.6506
Poland	146	78.8043	50	27.3743	-51.43	51.43
Belarus	138	74.4565	44	24.0223	-50.4342	50.4342
Bulgaria	121	65.2174	30	16.2011	-49.0163	49.0163
Senegal	44	23.3696	126	69.8324	46.4628	46.4628
Mongolia	170	91.8478	83	45.8101	-46.0378	46.0378
Croatia	126	67.9348	41	22.3464	-45.5884	45.5884
Myanmar	60	32.0652	138	76.5363	44.4711	44.4711
Iran	3	1.08696	80	44.1341	43.0471	43.0471
Nigeria	27	14.1304	100	55.3073	41.1768	41.1768
Indonesia	62	33.1522	133	73.743	40.5908	40.5908
Romania	120	64.6739	45	24.581	-40.0929	40.0929
Sudan	48	25.5435	115	63.6872	38.1437	38.1437
Mauritania	101	54.3478	166	92.1788	37.8309	37.8309
Costa Rica	97	52.1739	30	16.2011	-35.9728	35.9728
Gabon	80	42.9348	140	77.6536	34.7188	34.7188
Honduras	54	28.8043	114	63.1285	34.3241	34.3241
Saudi Arabia	149	80.4348	86	47.486	-32.9487	32.9487
Korea (South)	4	1.63043	60	32.9609	31.3305	31.3305
Malaysia	132	71.1957	75	41.3408	-29.8549	29.8549
Nicaragua	45	23.913	97	53.6313	29.7182	29.7182
Kyrgyzstan	51	27.1739	99	54.7486	27.5747	27.5747
Panama	107	57.6087	56	30.7263	-26.8824	26.8824
Chile	134	72.2826	84	46.3687	-25.9139	25.9139
Ghana	81	43.4783	124	68.7151	25.2368	25.2368
Oman	164	88.587	116	64.2458	-24.3411	24.3411
Kazakhstan	148	79.8913	101	55.8659	-24.0254	24.0254
Guatemala	70	37.5	110	60.8939	23.3939	23.3939
Argentina	116	62.5	74	40.7821	-21.7179	21.7179
Lebanon	108	58.1522	67	36.8715	-21.2807	21.2807
Philippines	47	25	82	45.2514	20.2514	20.2514
Albania	78	41.8478	40	21.7877	-20.0601	20.0601
Bosnia and Herzegovina	127	68.4783	158	87.7095	19.2312	19.2312
Thailand	91	48.913	121	67.0391	18.1261	18.1261
Brazil	103	55.4348	69	37.9888	-17.446	17.446
Colombia	75	40.2174	42	22.905	-17.3124	17.3124
Guinea-Bissau	46	24.4565	14	7.26257	-17.194	17.194
Ecuador	61	32.6087	87	48.0447	15.436	15.436
Peru	92	49.4565	64	35.1955	-14.261	14.261
Azerbaijan	86	46.1957	59	32.4022	-13.7934	13.7934
El Salvador	84	45.1087	106	58.6592	13.5505	13.5505
Tunisia	83	44.5652	58	31.8436	-12.7216	12.7216
Botswana	93	50	113	62.5698	12.5698	12.5698
South Africa	123	66.3043	142	78.7709	12.4666	12.4666
Jamaica	58	30.9783	78	43.0168	12.0385	12.0385
Sri Lanka	50	26.6304	70	38.5475	11.9171	11.9171
Mexico	94	50.5435	72	39.6648	-10.8787	10.8787
Namibia	100	53.8043	79	43.5754	-10.2289	10.2289
Bolivia	113	60.8696	92	50.838	-10.0316	10.0316
Ukraine	95	51.087	109	60.3352	9.24824	9.24824
Armenia	79	42.3913	63	34.6369	-7.75443	7.75443
Cuba	66	35.3261	55	30.1676	-5.15849	5.15849
Morocco	64	34.2391	54	29.6089	-4.63019	4.63019
Turkey	117	63.0435	108	59.7765	-3.26694	3.26694
Egypt	72	38.587	66	36.3128	-2.27411	2.27411
Paraguay	110	59.2391	105	58.1006	-1.13857	1.13857
China	122	65.7609	120	66.4804	0.719577	0.719577
Jordan	65	34.7826	62	34.0782	-0.704396	0.704396
Algeria	90	48.3696	88	48.6034	0.233787	0.233787

## Sheet: Data. EPI vs EF tot
	EF total (2018)		EPI (2018)
Country	rank best to worst	normalised 0-100	rank best to worst	normalised 0-100	rank difference	+/- removed
France	168	94.3503	2	0.564972	-93.7853	93.7853		average difference
United Kingdom	167	93.7853	6	2.82486	-90.9605	90.9605		37.6694
Germany	171	96.0452	13	6.77966	-89.2655	89.2655
Japan	174	97.7401	20	10.7345	-87.0056	87.0056		Kendall tau = -0.109, P<0.05
United States of America	177	99.435	27	14.6893	-84.7458	84.7458
Italy	165	92.6554	16	8.47458	-84.1808	84.1808
Spain	161	90.3955	12	6.21469	-84.1808	84.1808
Canada	169	94.9153	25	13.5593	-81.3559	81.3559
Lesotho	30	16.3842	173	97.1751	80.791	80.791
Australia	158	88.7006	21	11.2994	-77.4011	77.4011
Eritrea	28	15.2542	165	92.6554	77.4011	77.4011
Solomon Islands	14	7.34463	151	84.7458	77.4011	77.4011
Gambia	21	11.2994	156	87.5706	76.2712	76.2712
Comoros	11	5.64972	146	81.9209	76.2712	76.2712
Sweden	135	75.7062	5	2.25989	-73.4463	73.4463
Haiti	45	24.8588	174	97.7401	72.8814	72.8814
Netherlands	147	82.4859	18	9.60452	-72.8814	72.8814
Belgium	142	79.661	15	7.9096	-71.7514	71.7514
Burundi	53	29.3785	180	101.13	71.7514	71.7514
Austria	131	73.4463	8	3.9548	-69.4915	69.4915
Russian Federation	175	98.3051	52	28.8136	-69.4915	69.4915
Denmark	123	68.9266	3	1.12994	-67.7966	67.7966
Switzerland	121	67.7966	1	0	-67.7966	67.7966
Liberia	42	23.1638	160	89.8305	66.6667	66.6667
Hungary	122	68.3616	4	1.69492	-66.6667	66.6667
Timor-Leste	9	4.51977	125	70.0565	65.5367	65.5367
Grenada	4	1.69492	118	66.1017	64.4068	64.4068
Togo	49	27.1186	159	89.2655	62.1469	62.1469
Finland	120	67.2316	10	5.08475	-62.1469	62.1469
Poland	159	89.2655	50	27.6836	-61.5819	61.5819
Gabon	33	18.0791	140	78.5311	60.452	60.452
Mauritania	60	33.3333	166	93.2203	59.887	59.887
Greece	127	71.1864	22	11.8644	-59.322	59.322
Israel	124	69.4915	19	10.1695	-59.322	59.322
Sierra Leone	50	27.6836	155	87.0056	59.322	59.322
Guyana	24	12.9944	128	71.7514	58.7571	58.7571
Brazil	173	97.1751	69	38.4181	-58.7571	58.7571
Colombia	146	81.9209	42	23.1638	-58.7571	58.7571
Portugal	129	72.3164	26	14.1243	-58.1921	58.1921
Sao Tome and Principe	3	1.12994	104	58.1921	57.0621	57.0621
Bhutan	31	16.9492	131	73.4463	56.4972	56.4972
Czech Republic	133	74.5763	33	18.0791	-56.4972	56.4972
Mexico	170	95.4802	72	40.113	-55.3672	55.3672
Egypt	160	89.8305	66	36.7232	-53.1073	53.1073
Rwanda	54	29.9435	148	83.0508	53.1073	53.1073
Norway	108	60.452	14	7.34463	-53.1073	53.1073
Romania	139	77.9661	45	24.8588	-53.1073	53.1073
Papua New Guinea	70	38.9831	164	92.0904	53.1073	53.1073
Qatar	125	70.0565	32	17.5141	-52.5424	52.5424
Bosnia and Herzegovina	66	36.7232	158	88.7006	51.9774	51.9774
Ireland	99	55.3672	9	4.51977	-50.8475	50.8475
Fiji	20	10.7345	107	59.887	49.1525	49.1525
Suriname	17	9.03955	103	57.6271	48.5876	48.5876
Lao People's Democratic Republic	67	37.2881	153	85.8757	48.5876	48.5876
Saint Lucia	6	2.82486	91	50.8475	48.0226	48.0226
Benin	81	45.1977	166	93.2203	48.0226	48.0226
Bahamas	16	8.47458	98	54.8023	46.3277	46.3277
Belarus	126	70.6215	44	24.2938	-46.3277	46.3277
Morocco	136	76.2712	54	29.9435	-46.3277	46.3277
New Zealand	98	54.8023	17	9.03955	-45.7627	45.7627
Barbados	13	6.77966	93	51.9774	45.1977	45.1977
Argentina	153	85.8757	74	41.2429	-44.6328	44.6328
Madagascar	97	54.2373	175	98.3051	44.0678	44.0678
Cabo Verde	12	6.21469	89	49.7175	43.5028	43.5028
Botswana	37	20.339	113	63.2768	42.9379	42.9379
Malaysia	151	84.7458	75	41.8079	-42.9379	42.9379
Peru	140	78.5311	64	35.5932	-42.9379	42.9379
Slovakia	103	57.6271	28	15.2542	-42.3729	42.3729
Philippines	154	86.4407	82	45.7627	-40.678	40.678
Tajikistan	57	31.6384	129	72.3164	40.678	40.678
Dominica	2	0.564972	73	40.678	40.113	40.113
Bulgaria	101	56.4972	30	16.3842	-40.113	40.113
Zimbabwe	78	43.5028	149	83.6158	40.113	40.113
Saudi Arabia	157	88.1356	86	48.0226	-40.113	40.113
Antigua and Barbuda	7	3.38983	76	42.3729	38.9831	38.9831
Afghanistan	100	55.9322	168	94.3503	38.4181	38.4181
Turkmenistan	106	59.322	38	20.904	-38.4181	38.4181
Singapore	116	64.9718	49	27.1186	-37.8531	37.8531
Angola	104	58.1921	170	95.4802	37.2881	37.2881
United Arab Emirates	141	79.096	77	42.9379	-36.1582	36.1582
Nigeria	162	90.9605	100	55.9322	-35.0282	35.0282
Nepal	115	64.4068	176	98.8701	34.4633	34.4633
Algeria	148	83.0508	88	49.1525	-33.8983	33.8983
Chile	143	80.226	84	46.8927	-33.3333	33.3333
Burkina Faso	96	53.6723	154	86.4407	32.7684	32.7684
Mauritius	32	17.5141	90	50.2825	32.7684	32.7684
China	178	100	120	67.2316	-32.7684	32.7684
Turkey	166	93.2203	108	60.452	-32.7684	32.7684
Niger	117	65.5367	172	96.6102	31.0734	31.0734
Cambodia	95	53.1073	150	84.1808	31.0734	31.0734
Malawi	74	41.2429	127	71.1864	29.9435	29.9435
Kuwait	114	63.8418	61	33.8983	-29.9435	29.9435
Belize	29	15.8192	81	45.1977	29.3785	29.3785
Cameroon	110	61.5819	161	90.3955	28.8136	28.8136
Equatorial Guinea	23	12.4294	71	39.548	27.1186	27.1186
Lithuania	76	42.3729	29	15.8192	-26.5537	26.5537
Nicaragua	51	28.2486	97	54.2373	25.9887	25.9887
Tanzania	73	40.678	119	66.6667	25.9887	25.9887
Kazakhstan	145	81.3559	101	56.4972	-24.8588	24.8588
Sri Lanka	113	63.2768	70	38.9831	-24.2938	24.2938
Guinea	91	50.8475	134	75.1412	24.2938	24.2938
Honduras	71	39.548	114	63.8418	24.2938	24.2938
Kyrgyzstan	56	31.0734	99	55.3672	24.2938	24.2938
Georgia	52	28.8136	94	52.5424	23.7288	23.7288
Jamaica	36	19.774	78	43.5028	23.7288	23.7288
Mozambique	94	52.5424	135	75.7062	23.1638	23.1638
Montenegro	25	13.5593	65	36.1582	22.5989	22.5989
Luxembourg	47	25.9887	7	3.38983	-22.5989	22.5989
Ukraine	149	83.6158	109	61.0169	-22.5989	22.5989
Indonesia	172	96.6102	133	74.5763	-22.0339	22.0339
El Salvador	68	37.8531	106	59.322	21.4689	21.4689
Senegal	89	49.7175	126	70.6215	20.904	20.904
Libyan Arab Jamahiriya	87	48.5876	123	68.9266	20.339	20.339
Dominican Republic	82	45.7627	46	25.4237	-20.339	20.339
Namibia	43	23.7288	79	44.0678	20.339	20.339
Mali	111	62.1469	147	82.4859	20.339	20.339
Brunei Darussalam	18	9.60452	53	29.3785	19.774	19.774
Chad	102	57.0621	137	76.8362	19.774	19.774
Tunisia	93	51.9774	58	32.2034	-19.774	19.774
Thailand	155	87.0056	121	67.7966	-19.209	19.209
Croatia	75	41.8079	41	22.5989	-19.209	19.209
Costa Rica	63	35.0282	30	16.3842	-18.6441	18.6441
Iran	48	26.5537	80	44.6328	18.0791	18.0791
Bahrain	65	36.1582	96	53.6723	17.5141	17.5141
Viet Nam	163	91.5254	132	74.0113	-17.5141	17.5141
Saint Vincent and Grenadines	5	2.25989	36	19.774	17.5141	17.5141
Venezuela	80	44.6328	51	28.2486	-16.3842	16.3842
Zambia	88	49.1525	117	65.5367	16.3842	16.3842
Cuba	83	46.3277	55	30.5085	-15.8192	15.8192
Latvia	64	35.5932	37	20.339	-15.2542	15.2542
Slovenia	61	33.8983	34	18.6441	-15.2542	15.2542
Bangladesh	152	85.3107	179	100.565	15.2542	15.2542
Bolivia	119	66.6667	92	51.4124	-15.2542	15.2542
Azerbaijan	85	47.4576	59	32.7684	-14.6893	14.6893
Trinidad and Tobago	58	32.2034	35	19.209	-12.9944	12.9944
Armenia	41	22.5989	63	35.0282	12.4294	12.4294
South Africa	164	92.0904	142	79.661	-12.4294	12.4294
Serbia	105	58.7571	84	46.8927	-11.8644	11.8644
CÃ´te d'Ivoire	118	66.1017	139	77.9661	11.8644	11.8644
Ecuador	107	59.887	87	48.5876	-11.2994	11.2994
Sudan	134	75.1412	115	64.4068	-10.7345	10.7345
Paraguay	86	48.0226	105	58.7571	10.7345	10.7345
Malta	22	11.8644	4	1.69492	-10.1695	10.1695
Uganda	128	71.7514	145	81.3559	9.60452	9.60452
Lebanon	84	46.8927	67	37.2881	-9.60452	9.60452
Jordan	77	42.9379	62	34.4633	-8.47458	8.47458
Iraq	138	77.4011	152	85.3107	7.9096	7.9096
Pakistan	156	87.5706	169	94.9153	7.34463	7.34463
Guinea-Bissau	26	14.1243	14	7.34463	-6.77966	6.77966
Cyprus	35	19.209	24	12.9944	-6.21469	6.21469
Estonia	59	32.7684	48	26.5537	-6.21469	6.21469
Mongolia	92	51.4124	83	46.3277	-5.08475	5.08475
Ethiopia	150	84.1808	141	79.096	-5.08475	5.08475
Ghana	132	74.0113	124	69.4915	-4.51977	4.51977
Oman	109	61.0169	116	64.9718	3.9548	3.9548
Myanmar	144	80.791	138	77.4011	-3.38983	3.38983
Panama	62	34.4633	56	31.0734	-3.38983	3.38983
South Korea	55	30.5085	60	33.3333	2.82486	2.82486
Guatemala	112	62.7119	110	61.5819	-1.12994	1.12994
Albania	39	21.4689	40	22.0339	0.564972	0.564972
India	176	98.8701	177	99.435	0.564972	0.564972
Uzbekistan	137	76.8362	136	76.2712	-0.564972	0.564972
Kenya	130	72.8814	130	72.8814	0	0

## Sheet: Data. EPI 2010 pillars
Country	ENVHEALTH	Rank	ECOSYSTEM	Rank		2010 version
Albania	69.9254	78	72.9236	24
Algeria	67.5772	85	67.2475	47
Angola	18.2918	154	54.4049	96
Antigua and Barbuda	83.2074	37	56.3775	76
Argentina	74.4936	59	47.6	118
Armenia	71.6269	71	49.2604	112
Australia	91.7278	8	39.5834	141
Austria	89.4678	19	66.801	48
Azerbaijan	62.7214	94	55.4303	86
Bahrain	83.6938	34	0.22888	162
Bangladesh	32.3327	130	55.5722	82
Belarus	74.7297	57	56.0086	79
Belgium	89.053	22	27.0873	155
Belize	67.5805	84	72.2757	25
Benin	22.9429	148	56.2398	78
Bhutan	56.8751	103	79.1625	12
Bolivia	45.4038	113	43.2712	132
Bosnia and Herzegovina	77.1309	50	34.6071	150
Botswana	43.2801	115	39.3426	142
Brazil	71.6256	72	55.1853	90
Brunei Darussalam	86.2239	30	35.278	148
Bulgaria	73.2101	65	51.8544	103
Burkina Faso	12.2403	157	82.3341	7
Burundi	22.5606	149	65.2503	54
Cambodia	28.8133	135	54.5654	95
Cameroon	27.4289	139	61.8171	60
Canada	92.7734	3	40.1002	140
Central African Republic	22.3101	150	44.3739	127
Chad	6.13404	162	75.5603	20
Chile	81.2832	44	65.4023	53
China	58.6772	100	39.3323	143
Colombia	74.605	58	78.9428	13
Congo	29.3586	134	78.5768	15
Costa Rica	82.1833	41	90.6099	4
Côte d'Ivoire	26.2177	141	82.2825	8
Croatia	82.4693	40	54.8326	94
Cuba	84.3484	33	71.9144	26
Cyprus	87.6421	26	24.8851	157
Czech Republic	86.875	28	56.3664	77
Dem. Rep. Congo	11.5752	158	91.6948	3
Denmark	89.8197	18	48.488	116
Djibouti	51.4513	110	69.6362	39
Dominican Republic	72.5057	67	64.3769	56
Ecuador	75.7701	54	62.915	57
Egypt	63.0367	93	60.9713	63
El Salvador	68.8867	80	69.2608	42
Equatorial Guinea	35.0373	126	48.7677	114
Eritrea	30.5362	133	78.7241	14
Estonia	76.8452	51	50.7614	107
Ethiopia	11.0424	159	75.2398	21
Fiji	60.4056	96	71.4159	30
Finland	90.7456	12	58.7357	67
France	90.7456	11	65.6912	50
Gabon	54.0297	106	58.8576	66
Gambia	31.0574	132	69.589	40
Georgia	72.1365	68	55.1521	91
Germany	90.7456	14	55.6981	81
Ghana	32.8895	128	69.7783	38
Greece	86.5979	29	35.1344	149
Guatemala	56.3818	104	51.5627	104
Guinea	19.5919	153	69.1465	43
Guinea-Bissau	12.616	156	76.7209	19
Guyana	66.4019	87	52.0903	102
Haiti	28.0567	136	50.9337	106
Honduras	58.0421	102	41.7014	138
Hungary	82.6617	39	55.5662	83
Iceland	95.0917	1	91.8688	2
India	41.5928	120	55.0995	92
Indonesia	44.5888	114	44.6398	126
Iran	70.2051	76	49.7236	110
Iraq	39.5745	122	42.4208	137
Ireland	91.7278	7	42.4843	136
Israel	92.1051	6	32.7498	152
Italy	90.8678	9	55.2401	89
Jamaica	70.2494	75	45.8264	122
Japan	90.182	16	54.8996	93
Jordan	76.6657	52	35.5593	147
Kazakhstan	69.3244	79	45.2812	123
Kenya	32.1535	131	70.6216	33
Kuwait	83.4662	36	18.7848	160
Kyrgyzstan	65.2946	90	54.058	97
Laos	32.6327	129	86.574	5
Latvia	75.0513	56	69.976	35
Lebanon	77.326	48	38.4984	145
Libyan Arab Jamahiriya	68.0929	83	32.1923	153
Lithuania	74.3378	61	62.319	59
Luxembourg	90.7456	15	44.9193	125
Macedonia	77.8455	47	43.4069	130
Madagascar	21.5683	151	76.7665	18
Malawi	27.9849	137	74.9137	23
Malaysia	81.305	42	48.6669	115
Maldives	64.2587	91	67.6183	46
Mali	9.3404	160	69.5109	41
Malta	92.1155	5	60.5529	64
Mauritania	25.9671	142	41.3634	139
Mauritius	83.656	35	77.5129	16
Mexico	76.6279	53	58.0552	72
Moldova	68.7693	81	48.8832	113
Mongolia	42.7342	118	42.856	133
Morocco	73.3836	64	57.8417	73
Mozambique	23.1191	147	79.3303	10
Myanmar	42.6259	119	59.9724	65
Namibia	52.0192	109	66.5339	49
Nepal	41.3804	121	95.0917	1
Netherlands	89.3335	20	43.3774	131
New Zealand	90.7456	13	55.974	80
Nicaragua	58.7302	99	55.3766	87
Niger	0.0552267	163	75.0822	22
Nigeria	17.6382	155	62.7435	58
North Korea	54.0849	105	29.5426	154
Norway	90.7456	10	71.5186	29
Oman	71.2766	73	20.4688	158
Pakistan	42.8203	117	53.1087	100
Panama	71.7461	70	70.9869	31
Papua New Guinea	35.0989	125	53.4935	99
Paraguay	58.0679	101	68.9553	44
Peru	61.343	95	77.2108	17
Philippines	65.8766	88	65.4927	52
Poland	75.1928	55	51.0269	105
Portugal	87.5726	27	58.3964	70
Qatar	87.6909	25	10.082	161
Romania	72.6744	66	61.3431	62
Russia	68.5923	82	53.8335	98
Rwanda	20.3276	152	68.8894	45
Sao Tome and Principe	43.1447	116	71.5385	28
Saudi Arabia	66.6797	86	43.9609	129
Senegal	27.2279	140	57.3234	75
Serbia and Montenegro	83.1824	38	55.5605	84
Sierra Leone	8.87856	161	55.3558	88
Singapore	89.1824	21	50.0903	109
Slovakia	84.4977	32	64.4136	55
Slovenia	84.9753	31	44.9266	124
Solomon Islands	54.013	107	48.1917	117
South Africa	58.9998	98	42.5704	135
South Korea	80.1538	45	33.9359	151
Spain	88.7127	23	52.5203	101
Sri Lanka	45.8391	112	81.5896	9
Sudan	23.6131	145	70.5756	34
Suriname	70.7345	74	65.6209	51
Swaziland	38.0472	123	70.7389	32
Sweden	92.7734	2	79.3229	11
Switzerland	92.2887	4	85.897	6
Syria	73.6677	63	55.4942	85
Tajikistan	52.0435	108	50.5309	108
Tanzania	25.9128	143	69.894	36
Thailand	65.5799	89	58.7298	68
Togo	23.1523	146	49.7129	111
Trinidad and Tobago	70.1684	77	38.3258	146
Tunisia	77.163	49	43.9984	128
Turkey	74.4533	60	46.3417	120
Turkmenistan	51.2356	111	25.5539	156
Uganda	27.9386	138	71.6027	27
Ukraine	73.8506	62	42.5848	134
United Arab Emirates	81.2856	43	0.0552267	163
United Kingdom	89.8197	17	58.6558	69
United States of America	88.3004	24	38.6499	144
Uruguay	71.9977	69	46.2126	121
Uzbekistan	64.1172	92	20.4203	159
Venezuela	79.1316	46	46.6681	119
Viet Nam	59.8888	97	58.11	71
Yemen	34.9489	127	61.6767	61
Zambia	24.2113	144	69.7984	37
Zimbabwe	38.0389	124	57.5963	74

## Sheet: Data. All indices
	RANK
Country	ESSI (2018)	ESSI norm. 0-100	EVI (1999)	EVI norm. 0-100	EF pc (2018)	EF pc norm. 0-100	EF tot (2018)	EF tot norm. 0-100	CIEP (2015)	CIEP norm. 0-100	aENV (2010)	aENV norm. 0-100	pENV (2010)	pENV norm. 0-100	EPI (2020)	EPI norm. 0-100	EWI (2001)	EWI norm. 0-100	LPI-NE (2021)	LPI-NE norm. 0-100
Albania	65	39.2638	131	68.0628	46	25.8621	6	2.87356	49	31.7881	15	8.23529	38	20.904	62	34.0782	71	39.3258	56	33.1325
Algeria	62	37.4233	66	34.0314	54	30.4598	84	47.7011	78	50.9934	99	57.6471	79	44.0678	84	46.3687	85	47.191	152	90.9639
Angola	114	69.3252	16	7.8534	11	5.74713	50	28.1609	145	95.3642	107	62.3529	41	22.5989	158	87.7095	4	1.68539	121	72.2892
Argentina	32	19.0184	82	42.4084	68	38.5057	89	50.5747	89	58.2781	161	94.1176	91	50.8475	54	29.6089	108	60.1124	50	29.5181
Armenia	75	45.3988	29	14.6597	47	26.4368	7	3.44828	54	35.0993	48	27.6471	117	65.5367	53	29.0503	42	23.0337	91	54.2169
Australia	51	30.6748	23	11.5183	108	61.4943	94	53.4483	34	21.8543	163	95.2941	60	33.3333	13	6.70391	153	85.3933	21	12.0482
Austria	2	0.613497	184	95.8115	102	58.046	70	39.6552	18	11.2583	75	43.5294	58	32.2034	6	2.7933	101	56.1798	5	2.40964
Azerbaijan	71	42.9448	155	80.6283	52	29.3103	38	21.2644	96	62.9139	47	27.0588	37	20.339	72	39.6648	153	85.3933	136	81.3253
Bangladesh	134	81.5951	142	73.822	9	4.5977	88	50	148	97.351	139	81.1765	164	92.0904	162	89.9441	71	39.3258	149	89.1566
Belarus	59	35.5828	24	12.0419	84	47.7011	66	37.3563	70	45.6954	105	61.1765	74	41.2429	49	26.8156	57	31.4607	82	48.7952
Belgium	37	22.0859	181	94.2408	107	60.9195	78	44.2529	55	35.7616	43	24.7059	123	68.9266	15	7.82123	169	94.382	55	32.5301
Benin	163	99.3865	70	36.1257	32	17.8161	34	18.9655	134	88.0795	55	31.7647	98	54.8023	157	87.1508	2	0.561798	123	73.494
Bolivia	97	58.8957	35	17.801	67	37.931	60	33.908	75	49.0066	136	79.4118	32	17.5141	88	48.6034	17	8.98876	34	19.8795
Bosnia and Herzegovina	82	49.6933	101	52.356	76	43.1034	24	13.2184	60	39.0728	34	19.4118	68	37.8531	78	43.0168	81	44.9438	111	66.2651
Botswana	105	63.8037	1	0	57	32.1839	4	1.72414	84	54.9669	86	50	28	15.2542	103	56.9832	3	1.1236	132	78.9157
Brazil	12	6.74847	75	38.7435	63	35.6322	109	62.069	80	52.3179	171	100	111	62.1469	55	30.1676	118	65.7303	12	6.62651
Bulgaria	56	33.7423	122	63.3508	71	40.2299	48	27.0115	72	47.0199	90	52.3529	110	61.5819	41	22.3464	139	77.5281	84	50
Burkina Faso	156	95.092	18	8.90052	21	11.4943	44	24.7126	138	90.7285	74	42.9412	44	24.2938	112	62.0112	33	17.9775	99	59.0361
Burundi	154	93.865	84	43.4555	10	5.17241	14	7.47126	151	99.3377	35	20	61	33.8983	170	94.4134	28	15.1685	124	74.0964
Cameroon	129	78.5276	19	9.42408	22	12.069	59	33.3333	130	85.4305	137	80	89	49.7175	139	77.095	13	6.74157	101	60.241
Canada	8	4.29448	37	18.8482	20	10.9195	54	30.4598	11	6.62252	160	93.5294	21	11.2994	20	10.6145	94	52.2472	13	7.22892
Chile	10	5.52147	83	42.9319	112	63.7931	105	59.7701	28	17.8808	145	84.7059	97	54.2373	44	24.0223	144	80.3371	42	24.6988
China	106	64.4172	163	84.8168	80	45.4023	79	44.8276	146	96.0265	169	98.8235	162	90.9605	120	66.4804	153	85.3933	141	84.3373
Colombia	23	13.4969	92	47.644	72	40.8046	114	64.9425	68	44.3709	152	88.8235	109	61.0169	50	27.3743	101	56.1798	28	16.2651
Costa Rica	3	1.22699	156	81.1518	44	24.7126	82	46.5517	26	16.5563	109	63.5294	149	83.6158	52	28.4916	107	59.5506	23	13.253
Côte d'Ivoire	152	92.638	32	16.2304	2	0.574713	5	2.29885	142	93.3775	96	55.8824	80	44.6328	176	97.7654	35	19.1011	79	46.988
Croatia	24	14.1104	143	74.3455	60	33.908	22	12.069	32	20.5298	52	30	77	42.9379	34	18.4358	124	69.1011	31	18.0723
Cuba	31	18.4049	130	67.5393	75	42.5287	29	16.092	63	41.0596	57	32.9412	122	68.3616	64	35.1955	81	44.9438	95	56.6265
Czechia (Czech Republic)	27	15.9509	114	59.1623	40	22.4138	36	20.1149	50	32.4503	124	72.3529	132	74.0113	20	10.6145	124	69.1011	29	16.8675
Democratic Republic of the Congo	137	83.4356	85	43.9791	100	56.8966	72	40.8046	149	98.0132	142	82.9412	40	22.0339	125	69.2737	10	5.05618	102	60.8434
Denmark	19	11.0429	146	75.9162	106	60.3448	64	36.2069	45	29.1391	103	60	168	94.3503	1	0	139	77.5281	8	4.21687
Dominican Republic	54	32.5153	124	64.3979	41	22.9885	35	19.5402	81	52.9801	54	31.1765	119	66.6667	74	40.7821	71	39.3258	51	30.1205
Ecuador	25	14.7239	98	50.7853	35	19.5402	51	28.7356	43	27.8146	151	88.2353	157	88.1356	56	30.7263	71	39.3258	43	25.3012
Egypt	63	38.0368	93	48.1675	43	24.1379	96	54.5977	65	42.3841	130	75.8824	99	55.3672	94	51.9553	94	52.2472	156	93.3735
El Salvador	61	36.8098	148	76.9634	51	28.7356	25	13.7931	104	68.2119	60	34.7059	141	79.096	95	52.514	71	39.3258	153	91.5663
Estonia	41	24.5399	73	37.6963	111	63.2184	18	9.77011	19	11.9205	93	54.1176	62	34.4633	30	16.2011	123	68.5393	10	5.42169
Ethiopia	150	91.411	46	23.5602	14	7.47126	86	48.8506	132	86.755	117	68.2353	45	24.8588	134	74.3017	13	6.74157	127	75.9036
Finland	9	4.90798	50	25.6545	105	59.7701	61	34.4828	4	1.98675	68	39.4118	29	15.8192	7	3.35196	85	47.191	2	0.60241
France	15	8.58896	164	85.3403	85	48.2759	104	59.1954	52	33.7748	154	90	136	76.2712	5	2.23464	152	84.8315	17	9.63855
Gabon	73	44.1718	10	4.71204	48	27.0115	2	0.574713	57	37.0861	66	38.2353	16	8.47458	76	41.8994	21	11.236	59	34.9398
Germany	26	15.3374	159	82.7225	89	50.5747	107	60.9195	47	30.4636	143	83.5294	152	85.3107	10	5.02793	118	65.7303	19	10.8434
Ghana	135	82.2086	71	36.6492	49	27.5862	71	40.2299	139	91.3907	100	58.2353	142	79.661	168	93.2961	113	62.9213	100	59.6386
Greece	21	12.2699	153	79.5812	77	43.6782	67	37.931	56	36.4238	80	46.4706	87	48.5876	25	13.4078	124	69.1011	32	18.6747
Guatemala	88	53.3742	140	72.7749	42	23.5632	55	31.0345	87	56.9536	114	66.4706	151	84.7458	149	82.6816	85	47.191	92	54.8193
Guinea-Bissau	162	98.773	57	29.3194	25	13.7931	1	0	140	92.053	20	11.1765	24	12.9944	161	89.3855	6	2.80899	76	45.1807
Haiti	143	87.1166	144	74.8691	6	2.87356	9	4.5977	143	94.0397	89	51.7647	128	71.7514	170	94.4134	94	52.2472	154	92.1687
Honduras	84	50.9202	61	31.4136	31	17.2414	27	14.9425	67	43.7086	120	70	159	89.2655	116	64.2458	81	44.9438	80	47.5904
Hungary	33	19.6319	166	86.3874	74	41.954	63	35.6322	73	47.6821	131	76.4706	116	64.9718	33	17.8771	124	69.1011	35	20.4819
India	120	73.0061	178	92.6702	19	10.3448	112	63.7931	150	98.6755	165	96.4706	147	82.4859	168	93.2961	159	88.764	162	96.988
Indonesia	107	65.0307	117	60.733	36	20.1149	108	61.4943	131	86.0927	168	98.2353	166	93.2203	116	64.2458	68	37.6404	68	40.3614
Iran	66	39.8773	111	57.5916	3	1.14943	11	5.74713	85	55.6291	133	77.6471	63	35.0282	67	36.8715	129	71.9101	155	92.7711
Ireland	39	23.3129	120	62.3037	94	53.4483	47	26.4368	37	23.8411	102	59.4118	101	56.4972	16	8.37989	129	71.9101	15	8.43373
Israel	17	9.81595	174	90.5759	88	50	65	36.7816	27	17.2185	110	64.1176	165	92.6554	29	15.6425	163	91.0112	118	70.4819
Italy	7	3.68098	180	93.7173	81	45.977	101	57.4713	53	34.4371	134	78.2353	131	73.4463	20	10.6145	144	80.3371	46	27.1084
Jamaica	57	34.3558	179	93.1937	33	18.3908	3	1.14943	40	25.8278	39	22.3529	146	81.9209	66	36.3128	118	65.7303	142	84.9398
Japan	18	10.4294	185	96.3351	87	49.4253	110	62.6437	31	19.8675	167	97.6471	174	97.7401	12	6.14525	163	91.0112	18	10.241
Jordan	43	25.7669	107	55.4974	39	21.8391	31	17.2414	23	14.5695	67	38.8235	114	63.8418	48	26.257	153	85.3933	151	90.3614
Kazakhstan	101	61.3497	12	5.75916	92	52.2989	81	45.977	107	70.1987	81	47.0588	15	7.9096	85	46.9274	129	71.9101	104	62.0482
Kenya	133	80.9816	49	25.1309	13	6.89655	69	39.0805	137	90.0662	98	57.0588	43	23.7288	132	73.1844	54	29.7753	138	82.5301
Kyrgyzstan	80	48.4663	22	10.9948	1	0	15	8.04598	61	39.7351	46	26.4706	31	16.9492	105	58.1006	101	56.1798	65	38.5542
Latvia	20	11.6564	55	28.2723	29	16.092	16	8.62069	33	21.1921	59	34.1176	85	47.4576	36	19.5531	71	39.3258	7	3.61446
Lebanon	50	30.0613	182	94.7644	104	59.1954	23	12.6437	86	56.2914	32	18.2353	134	75.1412	78	43.0168	116	64.6067	120	71.6867
Lithuania	67	40.4908	113	58.6387	65	36.7816	37	20.6897	51	33.1126	44	25.2941	139	77.9661	35	18.9944	85	47.191	24	13.8554
Madagascar	141	85.8896	72	37.1728	101	57.4713	30	16.6667	136	89.404	121	70.5882	127	71.1864	174	96.648	57	31.4607	88	52.4096
Malaysia	69	41.7178	109	56.5445	12	6.32184	45	25.2874	62	40.3974	159	92.9412	171	96.0452	68	37.4302	124	69.1011	47	27.7108
Mauritania	132	80.3681	21	10.4712	79	44.8276	87	49.4253	109	71.5232	61	35.2941	52	28.8136	167	92.7374	108	60.1124	164	98.1928
Mexico	55	33.1288	102	52.8796	62	35.0575	19	10.3448	113	74.1722	166	97.0588	145	81.3559	51	27.933	173	96.6292	72	42.7711
Moldova	79	47.8528	121	62.8272	58	32.7586	106	60.3448	123	80.7947	58	33.5294	75	41.8079	87	48.0447	118	65.7303	140	83.7349
Mongolia	131	79.7546	6	2.6178	109	62.069	41	22.9885	82	53.6424	65	37.6471	35	19.209	147	81.5642	28	15.1685	116	69.2771
Morocco	70	42.3313	115	59.6859	38	21.2644	74	41.954	105	68.8742	119	69.4118	138	77.4011	100	55.3073	129	71.9101	126	75.3012
Mozambique	147	89.5706	17	8.37696	8	4.02299	43	24.1379	133	87.4172	77	44.7059	25	13.5593	136	75.419	42	23.0337	61	36.1446
Myanmar (formerly Burma)	128	77.9141	56	28.7958	34	18.9655	80	45.4023	114	74.8344	158	92.3529	144	80.791	179	99.4413	61	33.7079	58	34.3373
Namibia	102	61.9632	3	1.04712	61	34.4828	8	4.02299	90	58.9404	87	50.5882	73	40.678	104	57.5419	45	24.7191	69	40.9639
Nepal	121	73.6196	99	51.3089	18	9.77011	57	32.1839	116	76.1589	111	64.7059	106	59.322	145	80.4469	13	6.74157	145	86.747
Netherlands	38	22.6994	183	95.288	99	56.3218	83	47.1264	46	29.8013	108	62.9412	169	94.9153	11	5.58659	172	96.0674	44	25.9036
New Zealand	35	20.8589	89	46.0733	95	54.023	46	25.8621	22	13.9073	125	72.9412	161	90.3955	19	10.0559	113	62.9213	4	1.80723
Nicaragua	99	60.1227	60	30.8901	24	13.2184	13	6.89655	79	51.6556	82	47.6471	115	64.4068	108	59.7765	61	33.7079	48	28.3133
Niger	157	95.7055	7	3.14136	30	16.6667	58	32.7586	125	82.1192	26	14.7059	5	2.25989	152	84.3575	40	21.9101	128	76.506
Nigeria	142	86.5031	138	71.7277	17	9.1954	98	55.7471	152	100	146	85.2941	118	66.1017	151	83.7989	40	21.9101	130	77.7108
Norway	1	0	62	31.9372	98	55.7471	52	29.3103	3	1.3245	106	61.7647	46	25.4237	9	4.46927	94	52.2472	9	4.81928
Oman	77	46.6258	36	18.3246	103	58.6207	53	29.8851	8	4.63576	84	48.8235	84	46.8927	110	60.8939	153	85.3933	147	87.9518
Pakistan	126	76.6871	172	89.5288	7	3.44828	92	52.2989	129	84.7682	147	85.8824	126	70.6215	142	78.7709	85	47.191	167	100
Panama	22	12.8834	30	15.1832	64	36.2069	21	11.4943	36	23.1788	94	54.7059	113	63.2768	70	38.5475	116	64.6067	30	17.4699
Papua New Guinea	140	85.2761	38	19.3717	37	20.6897	26	14.3678	99	64.9007	144	84.1176	107	59.887	146	81.0056	50	27.5281	81	48.1928
Paraguay	93	56.4417	47	24.0838	66	37.3563	39	21.8391	59	38.4106	116	67.6471	49	27.1186	73	40.2235	71	39.3258	27	15.6627
Peru	60	36.1963	53	27.2251	56	31.6092	76	43.1034	69	45.0331	162	94.7059	154	86.4407	90	49.7207	21	11.236	26	15.0602
Philippines	100	60.7362	189	98.4293	26	14.3678	90	51.1494	115	75.4967	155	90.5882	170	95.4802	111	61.4525	129	71.9101	73	43.3735
Poland	48	28.8344	157	81.6754	91	51.7241	95	54.023	100	65.5629	128	74.7059	156	87.5706	37	20.1117	144	80.3371	45	26.506
Portugal	151	92.0245	136	70.6806	86	48.8506	68	38.5057	21	13.245	113	65.8824	121	67.7966	27	14.5251	139	77.5281	40	23.494
Republic of Korea (South Korea)	29	17.1779	171	89.0052	45	25.2874	10	5.17241	44	28.4768	149	87.0588	177	99.435	28	15.0838	159	88.764	56	33.1325
Romania	46	27.6074	137	71.2042	70	39.6552	75	42.5287	95	62.2517	138	80.5882	82	45.7627	32	17.3184	144	80.3371	39	22.8916
Russia	76	46.0123	63	32.4607	96	54.5977	111	63.2184	108	70.8609	164	95.8824	59	32.7684	58	31.8436	101	56.1798	77	45.7831
Saudi Arabia	94	57.0552	64	32.9843	93	52.8736	93	52.8736	77	50.3311	132	77.0588	33	18.0791	90	49.7207	169	94.382	134	80.1205
Senegal	119	72.3926	69	35.6021	23	12.6437	40	22.4138	111	72.8477	73	42.3529	120	67.2316	155	86.0335	45	24.7191	83	49.3976
Slovakia	30	17.7914	97	50.2618	90	51.1494	49	27.5862	35	22.5166	72	41.7647	65	36.1582	26	13.9665	108	60.1124	16	9.03614
Slovenia	6	3.06748	165	85.8639	97	55.1724	20	10.9195	16	9.93377	19	10.5882	104	58.1921	18	9.49721	118	65.7303	3	1.20482
South Africa	109	66.2577	125	64.9215	73	41.3793	100	56.8966	147	96.6887	153	89.4118	140	78.5311	95	52.514	159	88.764	146	87.3494
Spain	13	7.36196	152	79.0576	83	47.1264	97	55.1724	41	26.4901	135	78.8235	143	80.226	14	7.26257	174	97.191	38	22.2892
Sri Lanka	108	65.6442	132	68.5864	28	15.5172	56	31.6092	88	57.6159	127	74.1176	167	93.7853	109	60.3352	35	19.1011	60	35.5422
Sudan	136	82.8221	65	33.5079	27	14.9425	73	41.3793	127	83.4437	122	71.1765	36	19.774	130	72.067	71	39.3258	158	94.5783
Switzerland	4	1.84049	150	78.0105	82	46.5517	62	35.0575	10	5.96026	56	32.3529	71	39.548	3	1.11732	94	52.2472	6	3.01205
Tanzania	146	88.9571	43	21.9895	4	1.72414	28	15.5172	144	94.702	148	86.4706	81	45.1977	150	83.2402	45	24.7191	78	46.3855
Thailand	91	55.2147	105	54.4503	55	31.0345	91	51.7241	98	64.2384	156	91.1765	173	97.1751	78	43.0168	169	94.382	119	71.0843
Togo	155	94.4785	90	46.5969	16	8.62069	12	6.32184	141	92.7152	40	22.9412	103	57.6271	159	88.2682	6	2.80899	137	81.9277
Trinidad and Tobago	111	67.4847	175	91.0995	110	62.6437	17	9.1954	74	48.3444	101	58.8235	96	53.6723	69	37.9888	129	71.9101	114	68.0723
Tunisia	64	38.6503	103	53.4031	50	28.1609	42	23.5632	101	66.2252	45	25.8824	88	49.1525	71	39.1061	129	71.9101	143	85.5422
Turkey	40	23.9264	154	80.1047	69	39.0805	102	58.046	92	60.2649	141	82.3529	105	58.7571	99	54.7486	153	85.3933	97	57.8313
Ukraine	95	57.6687	119	61.7801	59	33.3333	85	48.2759	117	76.8212	157	91.7647	133	74.5763	60	32.9609	162	90.4494	110	65.6627
United Arab Emirates	81	49.0798	91	47.1204	113	64.3678	77	43.6782	12	7.28477	28	15.8824	92	51.4124	42	22.905	176	98.3146	106	63.253
United Kingdom	28	16.5644	173	90.0524	78	44.2529	103	58.6207	83	54.3046	140	81.7647	137	76.8362	4	1.67598	144	80.3371	25	14.4578
United States of America	47	28.2209	96	49.7382	114	64.9425	113	64.3678	97	63.5762	170	99.4118	124	69.4915	24	12.8492	139	77.5281	22	12.6506
Venezuela	34	20.2454	88	45.5497	5	2.29885	33	18.3908	122	80.1325	150	87.6471	112	62.7119	59	32.4022	71	39.3258	62	36.747
Vietnam	103	62.5767	160	83.2461	53	29.8851	99	56.3218	29	18.543	129	75.2941	148	83.0508	141	78.2123	61	33.7079	96	57.2289
Zimbabwe	122	74.2331	4	1.57068	15	8.04598	32	17.8161	106	69.5364	115	67.0588	93	51.9774	123	68.1564	42	23.0337	139	83.1325
