# Supplementary material for: Composite environmental indices—a case of rickety rankings
Source: PeerJ. 2023 Dec 11;11:e16325. doi: 10.7717/peerj.16325 (PMC10720475; doi:10.7717/peerj.16325)
Supplement: Supplemental Information 2 — Note. **Correlation is significant at the 0.01 level (2 tailed) [file peerj-11-16325-s002.docx]

**Summary Results of Kendall’s τ Examining Rank Correlations for 10 Iterations of the Environmental Sustainability Index (ESI) and Environmental Performance Index (EPI) (*n* = 94 countries).**

| ESI 2002 | .630** | |  | |  | |  | | |  | |  | | |  | |  | |  | |  | | |
| --- | --- | --- | --- | --- | --- | --- | --- | --- | --- | --- | --- | --- | --- | --- | --- | --- | --- | --- | --- | --- | --- | --- | --- |
| ESI 2005 | .604** | | .656** | |  | |  | | |  | |  | | |  | |  | |  | |  | | |
| EPI 2006 | .601** | | .429** | | .443** | |  | | |  | |  | | |  | |  | |  | |  | | |
| EPI 2008 | .592** | | .481** | | .478** | | .710** | | |  | |  | | |  | |  | |  | |  | | |
| EPI 2010 | .509** | | .423** | | .404** | | .581** | | | .722** | |  | | |  | |  | |  | |  | | |
| EPI 2012 | .509** | | .410** | | .410** | | .558** | | | .588** | | .528** | | |  | |  | |  | |  | | |
| EPI 2014 | .558** | | .368** | | .368** | | .654** | | | .626** | | .550** | | | .485** | |  | |  | |  | | |
| EPI 2016 | .570** | | .407** | | .424** | | .673** | | | .638** | | .572** | | | .447** | | .716** | |  | |  | | |
| EPI 2018 | .519** | | .372** | | .374** | | .636** | | | .621** | | .588** | | | .489** | | .696** | | .730** | |  | | |
| EPI 2020 | .563** | | .393** | | .399** | | .692** | | | .654** | | .599** | | | .509** | | .742** | | .760** | | .760** | | |
|  | ESI 2001 | | ESI 2002 | | ESI 2005 | | EPI 2006 | | | EPI 2008 | | EPI 2010 | | | EPI 2012 | | EPI 2014 | | EPI 2016 | | EPI 2018 | | |
|  | |  | | | |  | | |  | | | |  | | |  | | | |  | | |  | | |  | |  | |  | |
|  | | Degree of Correlation | | | | | | | | | | | | | | | | | | | | | | | | | | | | | |
|  | |  | |  | | | |  | | |  | | |  | | | |  | | | |  | | |  | |  | |  | |
|  | | weak positive | | moderate positive | | | | strong positive | | |  | | |  | | | |  | | | |  | | |  | |  | |  | |
|  | | 0.20 to 0.39 | | 0.40 to 0.59 | | | | 0.60 to 0.79 | | |  | | |  | | | |  | | | |  | | |  | |  | |  | |

Note:

**Correlation is significant at the 0.01 level (2 tailed)
